# Supplementary material
Source: PubMed Central journal article supplement (PMC7159053)
Supplement: mmc2.pdf [file mmc2.pdf]

# THE LANCET

## Infectious Diseases

### Supplementary appendix

This appendix formed part of the original submission and has been peer reviewed.  
We post it as supplied by the authors.

Supplement to: Shi H, Han X, Jiang N, et al. Radiological findings from 81 patients with COVID-19 pneumonia in Wuhan, China: a descriptive study. *Lancet Infect Dis* 2020; published online Feb 24. [https://doi.org/10.1016/S1473-3099\(20\)30086-4](https://doi.org/10.1016/S1473-3099(20)30086-4).

**Table 1. Clinical characteristics and laboratory findings of patients with COVID-19 pneumonia**

| Variable                             | Group 1<br>(n=15)            | Group 2<br>(n=21)             | Group 3<br>(n=30)             | Group 4<br>(n=15)            | All patients<br>(n=81)       | p value  |
|--------------------------------------|------------------------------|-------------------------------|-------------------------------|------------------------------|------------------------------|----------|
| Age (years)                          | 44.9 ± 9.0                   | 48.8 ± 13.0                   | 52.3 ± 13.0                   | 49.5 ± 11.0                  | 49.5 ± 11.0                  | 0.2778   |
| >50                                  | 4 (26.7%)<br>(7.8%, 55.1%)   | 10 (47.6%)<br>(25.7%, 70.2%)  | 19 (63.3%)<br>(43.9%, 80.1%)  | 7 (46.7%)<br>(21.3%, 73.4%)  | 40 (49.4%)<br>(38.1%, 60.7%) | 0.1444   |
| ≤50                                  | 11 (73.3%)<br>(44.9%, 92.2%) | 11 (52.4%)<br>(29.8%, 74.3%)  | 11 (36.7%)<br>(19.9%, 56.1%)  | 8 (53.3%)<br>(26.6%, 78.7%)  | 41 (50.6%)<br>(39.3%, 61.9%) |          |
| Sex                                  |                              |                               |                               |                              |                              | 0.0871   |
| Male                                 | 4 (26.7%)<br>(7.8%, 55.1%)   | 11 (52.4%)<br>(29.8%, 74.3%)  | 20 (66.7%)<br>(47.2%, 82.7%)  | 7 (46.6%)<br>(21.3%, 73.4%)  | 42 (51.9%)<br>(40.5%, 63.1%) |          |
| Female                               | 11 (73.3%)<br>(44.9%, 92.2%) | 10 (47.6%)<br>(25.7%, 70.2%)  | 10 (33.3%)<br>(17.3%, 52.8%)  | 8 (53.3%)<br>(26.6%, 78.7%)  | 39 (48.2%)<br>(36.9%, 59.5%) |          |
| History of exposure to Huanan market | 0 (0.0%)<br>(0.0%, 21.8%)    | 8 (38.1%)<br>(18.1%, 61.6%)   | 14 (46.7%)<br>(28.3%, 65.7%)  | 9 (60.0%)<br>(32.3%, 83.7%)  | 31 (38.3%)<br>(27.7%, 49.7%) | 0.0013*  |
| <b>Clinical symptoms</b>             |                              |                               |                               |                              |                              |          |
| Fever                                | 0 (0.0%)<br>(0.0%, 21.8%)    | 18 (85.7%)<br>(63.66%, 97.0%) | 27 (90.0%)<br>(73.47%, 97.9%) | 14 (93.3%)<br>(68.1%, 99.9%) | 59 (72.9%)<br>(61.8%, 82.1%) | <0.0001* |
| Maximal temperature, °C              | 36.6 ± 0.1                   | 38.1 ± 0.8                    | 38.2 ± 0.8                    | 38.5 ± 0.7                   | 37.9 ± 1.0                   | <0.0001* |
| ≤37.3                                | 15 (100%)<br>(78.2%, 100%)   | 3 (14.3%)<br>(3.1%, 36.3%)    | 5 (16.7%)<br>(5.6%, 34.7%)    | 1 (6.7%)<br>(0.2%, 32.0%)    | 24 (29.6%)<br>(20.0%, 40.8%) | <0.0001* |
| 37.3–38                              | 0 (0%)<br>(0.00%, 21.8%)     | 9 (42.9%)<br>(21.8%, 66.0%)   | 8 (26.7%)<br>(12.3%, 45.9%)   | 3 (20.0%)<br>(4.3%, 48.1%)   | 20 (24.7%)<br>(15.8%, 35.5%) |          |
| 38–39                                | 0 (0%)<br>(0.00%, 21.8%)     | 7 (33.3%)<br>(14.6%, 57.0%)   | 11 (36.7%)<br>(20.0%, 56.1%)  | 5 (33.3%)<br>(11.8%, 61.6%)  | 23 (28.4%)<br>(18.9%, 40.0%) |          |
| >39                                  | 0 (0%)<br>(0.0%, 21.8%)      | 2 (9.5%)<br>(1.2%, 30.4%)     | 6 (20.0%)<br>(7.7%, 38.6%)    | 6 (40.0%)<br>(16.3%, 67.7%)  | 14 (17.3%)<br>(9.8%, 27.3%)  |          |
| <b>Symptoms</b>                      |                              |                               |                               |                              |                              |          |
| Dyspnoea                             | 0 (0.0%)<br>(0.0%, 21.8%)    | 9 (42.9%)<br>(21.8%, 66.0%)   | 13 (43.3%)<br>(25.5%, 62.6%)  | 12 (80.0%)<br>(51.9%, 95.7%) | 34 (42.0%)<br>(31.1%, 53.5%) | <0.0001* |
| Chest tightness                      | 0 (0.0%)<br>(0.0%, 21.8%)    | 5 (23.8%)<br>(8.2%, 47.2%)    | 7 (23.3%)<br>(9.9%, 42.3%)    | 6 (40.0%)<br>(16.3%, 67.7%)  | 18 (22.2%)<br>(13.7%, 32.8%) | 0.0467   |
| Cough                                | 0 (0%)<br>(0.0%, 21.8%)      | 15 (71.4%)<br>(47.8%, 88.7%)  | 21 (70.0%)<br>(50.6%, 85.3%)  | 12 (80.0%)<br>(51.9%, 95.7%) | 48 (59.3%)<br>(47.8%, 70.1%) | <0.0001* |
| Sputum                               | 0 (0.0%)<br>(0.0%, 21.8%)    | 3 (14.3%)<br>(3.1%, 36.3%)    | 6 (20.0%)<br>(7.7%, 38.6%)    | 6 (40.0%)<br>(16.3%, 67.7%)  | 15 (18.5%)<br>(10.8%, 28.7%) | 0.0385*  |

|                                       |                              |                              |                              |                              |                              |         |
|---------------------------------------|------------------------------|------------------------------|------------------------------|------------------------------|------------------------------|---------|
| Rhinorrhoea                           | 0 (0.0%)<br>(0.0%, 21.8%)    | 5 (23.8%)<br>(8.2%, 47.2%)   | 10 (33.3%)<br>(17.3%, 52.8%) | 6 (40.0%)<br>(16.3%, 67.7%)  | 21 (25.9%)<br>(16.8%, 36.9%) | 0.0279* |
| Anorexia                              | 0 (0.0%)<br>(0.0%, 21.8%)    | 1 (4.8%)<br>(0.1%, 23.8%)    | 0 (0%)<br>(0.00%, 11.6%)     | 0 (0%)<br>(0.00%, 21.8%)     | 1 (1.2%)<br>(0.0%, 6.7%)     | 0.6296  |
| Weakness                              | 0                            | 1 (4.8%)<br>(0.1%, 23.8%)    | 4 (13.3%)<br>(3.8%, 30.7%)   | 2 (13.3%)<br>(1.7%, 40.5%)   | 7 (8.6%)<br>(3.6%, 17.0%)    | 0.4065  |
| Vomiting                              | 0 (0.0%)<br>(0.0%, 21.8%)    | 2 (9.5%)<br>(1.2%, 30.4%)    | 2 (6.7%)<br>(0.8%, 22.1%)    | 0 (0.0%)<br>(0.0%, 21.8%)    | 4 (4.9%)<br>(1.4%, 12.2%)    | 0.5777  |
| Headache                              | 0 (0.0%)<br>(0.0%, 21.8%)    | 2 (9.5%)<br>(1.2%, 30.4%)    | 2 (6.7%)<br>(0.8%, 22.1%)    | 1 (6.7%)<br>(0.2%, 32.0%)    | 5 (6.2%)<br>(2.0%, 13.8%)    | 0.8645  |
| Dizziness                             | 0 (0.0%)<br>(0.0%, 21.8%)    | 0 (0%)<br>(0.00%, 26.1%)     | 1 (3.33%)<br>(0.1%, 17.2%)   | 1 (6.67%)<br>(0.2%, 32.0%)   | 2 (2.5%)<br>(0.3%, 8.6%)     | 0.8056  |
| Diarrhoea                             | 0 (0.0%)<br>(0.0%, 21.8%)    | 1 (4.8%)<br>(0.1%, 23.8%)    | 1 (3.3%)<br>(0.1%, 17.2%)    | 1 (6.7%)<br>(0.2%, 32.0%)    | 3 (3.7%)<br>(0.8%, 10.4%)    | 1.0000  |
| <b>Laboratory results</b>             |                              |                              |                              |                              |                              |         |
| Leukocyte count (10 <sup>9</sup> /L)  | 8.0 ± 2.5                    | 7.8 ± 3.6                    | 8.4 ± 3.5                    | 8.2 ± 4.2                    | 8.1 ± 3.4                    | 0.9337  |
| <10                                   | 12 (80.0%)<br>(51.9%, 95.7%) | 14 (66.7%)<br>(43.0%, 85.4%) | 19 (63.3%)<br>(43.9%, 80.1%) | 10 (66.7%)<br>(38.4%, 88.2%) | 55 (67.9%)<br>(56.6%, 77.9%) | 0.7647  |
| ≥10                                   | 3 (20.0%)<br>(4.3%, 48.1%)   | 7 (33.3%)<br>(14.6%, 57.0%)  | 11 (36.7%)<br>(19.9%, 56.1%) | 5 (33.3%)<br>(11.8%, 61.6%)  | 26 (32.1%)<br>(22.2%, 43.4%) |         |
| Lymphocyte count (10 <sup>9</sup> /L) | 1.1 ± 0.3                    | 1.0 ± 0.3                    | 1.1 ± 0.3                    | 1.1 ± 0.3                    | 1.1 ± 0.3                    | 0.8557  |
| <1.0                                  | 3 (20.0%)<br>(4.3%, 48.1%)   | 9 (42.9%)<br>(21.8%, 66.0%)  | 11 (36.7%)<br>(19.9%, 56.1%) | 4 (26.7%)<br>(7.8%, 55.1%)   | 27 (33.3%)<br>(23.2%, 44.7%) | 0.4941  |
| ≥1.0                                  | 12 (80.0%)<br>(51.9%, 95.7%) | 12 (57.1%)<br>(34.0%, 78.2%) | 19 (63.3%)<br>(43.9%, 80.1%) | 11 (73.3%)<br>(44.9%, 92.2%) | 54 (66.7%)<br>(55.3%, 76.8%) |         |
| Platelet count(10 <sup>9</sup> /L)    | 202.9 ± 67.4                 | 213.5 ± 100.8                | 206.8 ± 96.1                 | 230.5 ± 134.8                | 212.2 ± 99.7                 | 0.8723  |
| <100                                  | 0 (0.0%)<br>(0.0%, 21.8%)    | 0 (0.0%)<br>(0.0%, 26.1%)    | 0 (0.0%)<br>(0.0%, 11.6%)    | 0 (0.0%)<br>(0.0%, 21.8%)    | 0 (0.0%)<br>(0.0%, 4.5%)     | -       |
| ≥100                                  | 15 (100%)<br>(78.2%, 100%)   | 21 (100%)<br>(83.9%, 100%)   | 30 (100%)<br>(88.4%, 100%)   | 15 (100%)<br>(78.2%, 100%)   | 81 (100%)<br>(95.6%, 100%)   |         |
| Haemoglobin (ng/mL)                   | 125.1 ± 13.5                 | 126.7 ± 13.4                 | 119.6 ± 12.8                 | 124.8 ± 9.1                  | 123.9 ± 12.0                 | 0.6494  |
| C-reactive protein (mg/L)             | 6.9 ± 5.4                    | 61.4 ± 39.6                  | 71.3 ± 39.8                  | 49.8 ± 42.4                  | 47.6 ± 41.8                  | 0.0051* |
| Serum amyloid A protein (mg/L)        | 143.3 ± 108.4                | 257.6 ± 264.2                | 216.6 ± 66.7                 | /                            | 213.5 ± 177.8                | 0.3300  |
| ALT (U/L)                             | 30.8 ± 8.9                   | 50.6 ± 24.8                  | 48.7 ± 33.1                  | 50.6 ± 37.7                  | 46.2 ± 29.5                  | 0.1629  |
| AST (U/L)                             | 30.2 ± 8.7                   | 47.7 ± 20.8                  | 42.7 ± 18.0                  | 37.8 ± 16.4                  | 40.8 ± 17.9                  | 0.0026* |
| ≤40                                   | 11 (73.3%)                   | 8 (38.1%)                    | 12 (40.0%)                   | 7 (46.7%)                    | 38 (46.9%)                   | 0.1586  |

|                                |                            |                              |                              |                             |                              |        |
|--------------------------------|----------------------------|------------------------------|------------------------------|-----------------------------|------------------------------|--------|
|                                | (44.9%, 92.2%)             | (18.1%, 61.6%)               | (22.7%, 59.4%)               | (21.3%, 73.4%)              | (35.7%, 58.3%)               |        |
| >40                            | 4 (26.7%)<br>(7.8%, 55.1%) | 13 (61.9%)<br>(38.4%, 81.9%) | 18 (60.0%)<br>(40.6%, 77.3%) | 8 (53.3%)<br>(26.6%, 78.7%) | 43 (53.1%)<br>(41.7%, 64.3%) |        |
| T-BIL (µmol/L)                 | 9.2 ± 0.6                  | 14.1 ± 4.3                   | 11.9 ± 3.9                   | /                           | 11.9 ± 3.6                   | 0.4526 |
| Albumin (g/L)                  | /                          | 34.0 ± 9.3                   | 30.1 ± 2.8                   | /                           | 32.9 ± 8.1                   | 0.5666 |
| Glucose (mmol/L)               | 6.4 ± 5.0                  | 5.2 ± 1.9                    | 6.8 ± 1.6                    | /                           | 6.4 ± 2.1                    | 0.8713 |
| Creatinine (µmol/L)            | 63.7 ± 16.5                | 68.0 ± 15.4                  | 115.4 ± 46.2                 | 58.4 ± 1.3                  | 75.4 ± 29.8                  | 0.1803 |
| PT (s)                         | 10.6 ± 0.9                 | 10.5 ± 0.4                   | 10.7 ± 1.0                   | 10.9 ± 1.6                  | 10.7 ± 0.9                   | 0.9022 |
| ATPP (s)                       | 26.9 ± 3.9                 | 34.3 ± 6.7                   | 34.5 ± 13.1                  | 29.2 ± 2.4                  | 32.1 ± 7.6                   | 0.4814 |
| TT (s)                         | 21.8 ± 5.4                 | 32.3 ± 8.2                   | 24.9 ± 7.6                   | 32.3 ± 7.9                  | 28.9 ± 8.4                   | 0.3169 |
| FIB (g/L)                      | 0.7 ± 0.3                  | 1.92 ± 3.5                   | 2.3 ± 3.0                    | 0.3 ± 0.1                   | 1.5 ± 2.3                    | 0.7960 |
| D-dimer (mg/L)                 | 6.5 ± 0.3                  | 6.9 ± 1.1                    | 5.8 ± 0.2                    | /                           | 6.5 ± 0.8                    | 0.4940 |
| <b>Comorbidities, n (%)</b>    | 4 (26.7%)<br>(7.8%, 55.1%) | 5 (23.8%)<br>(8.2%, 47.2%)   | 9 (30.0%)<br>(14.7%, 49.4%)  | 3 (20.0%)<br>(4.3%, 48.1%)  | 21 (25.9%)<br>(16.8%, 36.9%) | 0.9397 |
| Chronic pulmonary disease      | 1 (6.7%)<br>(0.2%, 32.0%)  | 3 (14.3%)<br>(3.1%, 36.3%)   | 3 (10.0%)<br>(2.1%, 26.5%)   | 2 (13.3%)<br>(1.7%, 40.5%)  | 9 (11.1%)<br>(5.2%, 20.1%)   | 0.8945 |
| Diabetes                       | 3 (20.0%)<br>(4.3%, 48.1%) | 2 (9.5%)<br>(1.2%, 30.4%)    | 3 (10.0%)<br>(2.1%, 26.5%)   | 2 (13.3%)<br>(1.7%, 40.5%)  | 10 (12.4%)<br>(6.1%, 21.5%)  | 0.8005 |
| Hypertension                   | 2 (13.3%)<br>(1.7%, 40.5%) | 1 (4.8%)<br>(0.1%, 23.8%)    | 7 (23.3%)<br>(9.9%, 42.3%)   | 2 (13.3%)<br>(1.7%, 40.5%)  | 12 (14.8%)<br>(7.9%, 24.5%)  | 0.3571 |
| Chronic renal function failure | 0 (0.0%)<br>(0.0%, 21.8%)  | 0 (0.0%)<br>(0.0%, 26.1%)    | 3 (10.0%)<br>(2.1%, 26.5%)   | 0 (0.0%)<br>(0.0%, 21.8%)   | 3 (3.7%)<br>(0.8%, 10.4%)    | 0.3101 |
| Cardiovascular disease         | 3 (20.0%)<br>(4.3%, 48.1%) | 1 (4.8%)<br>(0.1%, 23.8%)    | 3 (10.0%)<br>(2.1%, 26.5%)   | 1 (6.7%)<br>(0.5%, 32.0%)   | 8 (9.9%)<br>(4.4%, 18.5%)    | 0.5494 |
| Cerebrovascular disease        | 1 (6.7%)<br>(0.2%, 32.0%)  | 1 (4.8%)<br>(0.1%, 23.8%)    | 3 (10.0%)<br>(2.1%, 26.5%)   | 1 (6.7%)<br>(0.2%, 32.0%)   | 6 (7.4%)<br>(2.8%, 15.4%)    | 0.9367 |
| Malignancy                     | 1 (6.7%)<br>(0.2%, 32.0%)  | 1 (4.8%)<br>(0.1%, 23.8%)    | 2 (6.7%)<br>(0.8%, 22.1%)    | 0 (0.0%)<br>(0.0%, 21.8%)   | 4 (5.0%)<br>(1.4%, 12.2%)    | 0.9148 |
| Hepatitis or liver cirrhosis   | 0 (0.0%)<br>(0.0%, 21.8%)  | 2 (9.5%)<br>(1.2%, 30.4%)    | 3 (10.0%)<br>(2.1%, 26.5%)   | 2 (13.3%)<br>(1.7%, 40.5%)  | 7 (8.6%)<br>(3.6%, 17.0%)    | 0.6812 |

Numerical data are mean ± SD; nominal data are n (%) (95% CI).

ALT, alanine aminotransferase; AST, aspartate aminotransferase; T-BIL, total bilirubin; PT, prothrombin time; APTT, Activated partial thromboplastin time; TT, thrombin time; FIB, fibrinogen

\*p<0.05 between groups 1–4

**Table 2. Imaging features extracted from CT images of patients with COVID-19 pneumonia**

| <b>CT characteristics</b>                                 | <b>Definition</b>                                                                                                                                                                                                                                                                                                                                                                          |
|-----------------------------------------------------------|--------------------------------------------------------------------------------------------------------------------------------------------------------------------------------------------------------------------------------------------------------------------------------------------------------------------------------------------------------------------------------------------|
| Lung involvement                                          | Categorized as unilateral or bilateral lung involvement                                                                                                                                                                                                                                                                                                                                    |
| The lung segment involved                                 | Each segment of the lung was reviewed for presence of any opacification                                                                                                                                                                                                                                                                                                                    |
| Location                                                  | Central, lesion located in the interior two-thirds of the lung; Peripheral, in the outer one-third of the lung; Both central and peripheral                                                                                                                                                                                                                                                |
| Predominant distribution of opacities                     | Subpleural, involving mainly the peripheral of the lung; Peribronchovascular, surrounding mainly the peribronchovascular bundle. Random, without predilection for subpleural or peribronchovascular regions                                                                                                                                                                                |
| Extent of lesion involvement                              | Categorized as focal, multifocal, diffuse                                                                                                                                                                                                                                                                                                                                                  |
| Predominantly CT pattern                                  | Ground glass opacity pattern, a hazy, gauze-like opacity, through which pulmonary vessels are still visible; Consolidation pattern, homogeneous opacification of the parenchyma with obscuration of the underlying vessels; Reticular pattern, interstitial lesions of pulmonary parenchymal; Mixed pattern, combination of consolidation, ground glass opacities, and reticular opacities |
| Presence of nodule                                        | Categorized as random, centrilobular, subpleural, peribronchovascular                                                                                                                                                                                                                                                                                                                      |
| Tree-in-bud                                               | Constellation of small centrilobular nodule and concomitant branching opacities                                                                                                                                                                                                                                                                                                            |
| Margin definition                                         | Evaluated in the lung window, and indicated as well-defined, or poor-defined                                                                                                                                                                                                                                                                                                               |
| Interlobular septal thickening                            | Categorized as smooth interlobular septal thickening or irregular interlobular septal thickening                                                                                                                                                                                                                                                                                           |
| Presence of crazy-paving                                  | Interlobular septal thickening with superimposed ground glass opacification                                                                                                                                                                                                                                                                                                                |
| Presence of air bronchogram                               | A pattern of air-filled (low-attenuation) bronchi on a back- ground of opaque (high-attenuation) air- less lung                                                                                                                                                                                                                                                                            |
| Bronchiolectasis                                          | Dilatation of bronchioles                                                                                                                                                                                                                                                                                                                                                                  |
| Cavitation                                                | Presence or absence of cavitation                                                                                                                                                                                                                                                                                                                                                          |
| Calcifications                                            | Presence or absence of calcifications                                                                                                                                                                                                                                                                                                                                                      |
| Round cystic changes                                      | Presence or absence of round cystic changes                                                                                                                                                                                                                                                                                                                                                |
| Thickening of the adjacent pleura                         | Thickening of the adjacent fissural or peripheral pleura                                                                                                                                                                                                                                                                                                                                   |
| Pleural effusion                                          | Fluid in the pleural cavity                                                                                                                                                                                                                                                                                                                                                                |
| Lymphadenopathy                                           | Presence or absence of thoracic lymphadenopathy (hilar or mediastinal) with short-axis diameter greater than 1 cm                                                                                                                                                                                                                                                                          |
| Evolution of areas of opacification on follow-up chest CT | Categorized as no significant change, resolution or develop                                                                                                                                                                                                                                                                                                                                |

**Table 3. CT Features of Patients with COVID-19 pneumonia**

| <b>Location</b>                              | <b>Group 1<br/>(n=15)</b>    | <b>Group 2<br/>(n=21)</b>    | <b>Group 3<br/>(n=30)</b>    | <b>Group 4<br/>(n=15)</b>    | <b>All patients<br/>(n=81)</b> | <b>p value</b> |
|----------------------------------------------|------------------------------|------------------------------|------------------------------|------------------------------|--------------------------------|----------------|
| <b>Lung involvement</b>                      |                              |                              |                              |                              |                                |                |
| Unilateral                                   | 9 (60.0%)<br>(32.3%, 83.7%)  | 2 (9.5%)<br>(1.2%, 30.4%)    | 4 (13.3%)<br>(3.8%, 30.7%)   | 2 (13.3%)<br>(1.7%, 40.5%)   | 17 (21.0%)<br>(12.7%, 31.5%)   | 0.0019*        |
| Bilateral                                    | 6 (40.0%)<br>(16.3%, 67.7%)  | 19 (90.5%)<br>(69.6%, 98.8%) | 26 (86.7%)<br>(69.3%, 96.2%) | 13 (86.7%)<br>(59.5%, 98.3%) | 64 (79.0%)<br>(68.5%, 87.3%)   |                |
| <b>Location</b>                              |                              |                              |                              |                              |                                |                |
| Central                                      | 6 (40.0%)<br>(16.3%, 67.7%)  | 2 (9.5%)<br>(1.2%, 30.4%)    | 2 (6.7%)<br>(0.8%, 22.1%)    | 0 (0.0%)<br>(0.0%, 21.8%)    | 10 (12.4%)<br>(6.1%, 21.5%)    | 0.0002*        |
| Peripheral                                   | 9 (60.0%)<br>(32.3%, 83.7%)  | 15 (71.4%)<br>(47.8%, 88.7%) | 12 (40.0%)<br>(22.7%, 59.4%) | 8 (53.3%)<br>(26.6%, 78.7%)  | 44 (54.3%)<br>(42.9%, 65.4%)   |                |
| Both central and peripheral                  | 0 (0.0%)<br>(0.0%, 21.8%)    | 4 (19.1%)<br>(5.5%, 41.9%)   | 16 (53.3%)<br>(34.3%, 71.7%) | 7 (46.7%)<br>(21.3%, 73.4%)  | 27 (33.3%)<br>(23.2%, 44.7%)   |                |
| <b>Predominant distribution of opacities</b> |                              |                              |                              |                              |                                |                |
| Random                                       | 2 (13.3%)<br>(1.7%, 40.5%)   | 10 (47.6%)<br>(25.7%, 70.2%) | 15 (50.0%)<br>(31.3%, 68.7%) | 6 (40.0%)<br>(16.3%, 67.7%)  | 33 (40.7%)<br>(30.0%, 52.2%)   | 0.1166         |
| Subpleural                                   | 9 (60.0%)<br>(32.3%, 83.7%)  | 6 (28.6%)<br>(11.3%, 52.2%)  | 13 (43.3%)<br>(25.5%, 62.6%) | 7 (46.7%)<br>(21.3%, 73.4%)  | 35 (43.2%)<br>(32.2%, 54.7%)   |                |
| Peribronchovascular                          | 4 (26.7%)<br>(7.8%, 55.1%)   | 5 (23.8%)<br>(8.2%, 47.2%)   | 2 (6.7%)<br>(0.8%, 22.1%)    | 2 (13.3%)<br>(1.7%, 40.5%)   | 13 (16.1%)<br>(8.8%, 25.9%)    |                |
| <b>Extent of lesion involvement</b>          |                              |                              |                              |                              |                                |                |
| focal                                        | 7 (46.7%)<br>(21.3%, 73.4%)  | 5 (23.8%)<br>(8.2%, 47.2%)   | 3 (10.0%)<br>(2.1%, 26.5%)   | 0 (0.0%)<br>(0.0%, 21.8%)    | 15 (18.5%)<br>(10.8%, 28.7%)   | 0.0001*        |
| multifocal                                   | 8 (53.3%)<br>(26.6%, 78.7%)  | 5 (23.8%)<br>(8.2%, 47.2%)   | 9 (30.0%)<br>(14.7%, 49.4%)  | 8 (53.3%)<br>(26.6%, 78.7%)  | 30 (37.0%)<br>(26.6%, 48.5%)   |                |
| diffuse                                      | 0 (0.0%)<br>(0.0%, 21.8%)    | 11 (52.4%)<br>(29.8%, 74.3%) | 18 (60.0%)<br>(40.6%, 77.3%) | 7 (46.7%)<br>(21.3%, 73.4%)  | 36 (44.4%)<br>(33.4%, 55.9%)   |                |
| <b>Predominant CT pattern</b>                |                              |                              |                              |                              |                                |                |
| Ground glass opacity pattern                 | 14 (93.3%)<br>(68.1%, 99.8%) | 17 (81.0%)<br>(58.1%, 94.6%) | 17 (56.7%)<br>(37.4%, 74.5%) | 5 (33.3%)<br>(11.8%, 61.6%)  | 53 (65.4%)<br>(54.0%, 75.7%)   | 0.0046*        |
| Consolidation pattern                        | 1 (6.7%)<br>(0.2%, 32.0%)    | 1 (4.8%)<br>(0.1%, 23.8%)    | 9 (30.0%)<br>(14.7%, 49.4%)  | 3 (20.0%)<br>(4.3%, 48.1%)   | 14 (17.3%)<br>(9.8%, 27.3%)    |                |
| Reticular pattern                            | 0 (0.0%)<br>(0.0%, 21.8%)    | 0 (0.0%)<br>(0.0%, 16.1%)    | 1 (3.3%)<br>(0.1%, 17.2%)    | 2 (13.3%)<br>(1.7%, 40.5%)   | 3 (3.7%)<br>(0.8%, 10.4%)      |                |

|                                       |                              |                              |                              |                              |                              |         |
|---------------------------------------|------------------------------|------------------------------|------------------------------|------------------------------|------------------------------|---------|
| Mixed pattern                         | 0 (0.0%)<br>(0.0%, 21.8%)    | 3 (14.3%)<br>(3.1%, 36.3%)   | 3 (10.0%)<br>(2.1%, 26.5%)   | 5 (33.3%)<br>(11.8%, 61.6%)  | 11 (13.6%)<br>(7.0%, 23.0%)  |         |
| Presence of nodule                    | 0 (0.0%)<br>(0.0%, 21.8%)    | 2 (9.5%)<br>(1.2%, 30.4%)    | 3 (10.0%)<br>(2.1%, 26.5%)   | 0 (0.0%)<br>(0.0%, 21.8%)    | 5 (6.2%)<br>(2.0%, 13.8%)    | 0.4697  |
| <b>Margin definition</b>              |                              |                              |                              |                              |                              |         |
| Well-defined                          | 3 (20.0%)<br>(4.3%, 48.1%)   | 5 (23.8%)<br>(8.2%, 47.5%)   | 6 (20.0%)<br>(7.7%, 38.6%)   | 1 (6.7%)<br>(0.2%, 32.0%)    | 15 (18.5%)<br>(10.8%, 28.7%) | 0.6397  |
| Ill-defined                           | 12 (80.0%)<br>(51.9%, 95.7%) | 16 (76.2%)<br>(52.8%, 91.8%) | 24 (80.0%)<br>(61.4%, 92.3%) | 14 (93.3%)<br>(68.1%, 99.8%) | 66 (81.5%)<br>(71.3%, 89.3%) |         |
| <b>Interlobular septal thickening</b> |                              |                              |                              |                              |                              |         |
| Absence                               | 15 (100%)<br>(78.2%, 100%)   | 11 (52.4%)<br>(29.8%, 74.3%) | 17 (56.7%)<br>(37.4%, 74.5%) | 10 (66.7%)<br>(38.4%, 88.2%) | 53 (65.4%)<br>(54.0%, 75.7%) | 0.0030* |
| Smooth                                | 0 (0.0%)<br>(0.0%, 21.8%)    | 9 (42.9%)<br>(21.8%, 66.0%)  | 8 (26.7%)<br>(12.1%, 45.9%)  | 1 (6.7%)<br>(0.2%, 32.0%)    | 18 (22.2%)<br>(13.7%, 32.8%) |         |
| Irregular                             | 0 (0.0%)<br>(0.0%, 21.8%)    | 1 (4.8%)<br>(0.1%, 23.8%)    | 5 (16.7%)<br>(5.6%, 34.7%)   | 4 (26.7%)<br>(7.8%, 55.1%)   | 10 (12.4%)<br>(6.1%, 21.5%)  |         |
| Bronchiolectasis                      | 0 (100%)<br>(0.0%, 21.8%)    | 3 (14.3%)<br>(3.1%, 36.3%)   | 4 (13.3%)<br>(3.8%, 30.7%)   | 2 (13.3%)<br>(1.7%, 40.5%)   | 9 (11.1%)<br>(5.2%, 20.1%)   | 0.4651  |
| Crazy-paving                          | 0 (0.0%)<br>(0.0%, 21.8%)    | 2 (9.5%)<br>(1.2%, 30.4%)    | 4 (13.3%)<br>(3.8%, 30.7%)   | 2 (13.3%)<br>(1.7%, 40.5%)   | 8 (9.9%)<br>(4.4%, 18.5%)    | 0.6052  |
| Air bronchogram                       | 1 (6.7%)<br>(0.2%, 32.0%)    | 12 (57.1%)<br>(34.0%, 78.2%) | 18 (60.0%)<br>(40.6%, 77.3%) | 7 (46.7%)<br>(21.3%, 73.4%)  | 38 (46.9%)<br>(35.7%, 58.3%) | 0.0033* |
| Round cystic changes                  | 0 (0.0%)<br>(0.0%, 21.8%)    | 3 (14.3%)<br>(3.1%, 36.3%)   | 4 (13.3%)<br>(3.8%, 30.7%)   | 1 (6.7%)<br>(0.2%, 32.0%)    | 8 (9.9%)<br>(4.4%, 18.5%)    | 0.4780  |
| Thickening of the adjacent pleura     | 0 (0.0%)<br>(0.0%, 21.8%)    | 5 (23.8%)<br>(8.2%, 47.2%)   | 14 (46.7%)<br>(28.3%, 65.7%) | 7 (46.7%)<br>(21.3%, 73.4%)  | 26 (32.1%)<br>(22.2%, 43.4%) | 0.0029* |
| Pleural effusion                      | 0 (0.0%)<br>(0.0%, 21.8%)    | 1 (4.8%)<br>(0.12%, 23.8%)   | 1 (3.3%)<br>(0.1%, 17.2%)    | 2 (13.3%)<br>(1.7%, 40.5%)   | 4 (4.9%)<br>(1.4%, 12.2%)    | 0.4715  |
| Lymphadenopathy                       | 0 (0.0%)<br>(0.0%, 21.8%)    | 3 (14.3%)<br>(3.1%, 36.3%)   | 0 (0%)<br>(0.088.4%, 11.6%)  | 2 (13.3%)<br>(1.7%, 40.5%)   | 5 (6.2%)<br>(2.0%, 13.8%)    | 0.0372* |

Data are n (%) (95% CI).

\*p<0.05 between groups 1–4.

**Table 4 Number of segments affected by lesions between groups**

| Location                 | Group 1<br>(n=15)           | Group 2<br>(n=21)            | Group 3<br>(n=30)            | Group 4<br>(n=15)            | All patients<br>(n=81)       | p value  |
|--------------------------|-----------------------------|------------------------------|------------------------------|------------------------------|------------------------------|----------|
| <b>Left upper lobe</b>   |                             |                              |                              |                              |                              |          |
| Apical posterior         | 0 (0.0%)<br>(0.0%, 21.8%)   | 7 (33.3%)<br>(14.6%, 57.0%)  | 17 (56.7%)<br>(37.4%, 74.5%) | 9 (60.0%)<br>(32.3%, 83.7%)  | 33 (40.7%)<br>(30.0%, 52.2%) | 0.0003*  |
| Anterior                 | 3 (20.0%)<br>(4.3%, 48.1%)  | 13 (61.9%)<br>(38.4%, 81.9%) | 25 (83.3%)<br>(65.3%, 94.4%) | 10 (66.7%)<br>(38.4%, 88.2%) | 51 (63.0%)<br>(51.5%, 73.4%) | 0.0005*  |
| Superior lingula         | 1 (6.7%)<br>(0.2%, 32.0%)   | 14 (66.7%)<br>(43.0%, 85.4%) | 21 (70.0%)<br>(50.6%, 85.3%) | 11 (73.3%)<br>(44.9%, 92.2%) | 47 (58.0%)<br>(46.5%, 68.9%) | 0.0001*  |
| Inferior lingula         | 1 (6.7%)<br>(0.2%, 32.0%)   | 13 (61.9%)<br>(38.4%, 81.9%) | 19 (63.3%)<br>(43.9%, 80.1%) | 9 (60.0%)<br>(32.3%, 83.7%)  | 42 (51.9%)<br>(40.5%, 63.1%) | 0.0010*  |
| Total                    | 5                           | 47                           | 82                           | 39                           | 173                          |          |
| <b>Left lower lobe</b>   |                             |                              |                              |                              |                              |          |
| Superior                 | 7 (46.7%)<br>(21.3%, 73.4%) | 19 (90.5%)<br>(69.6%, 98.8%) | 25 (83.3%)<br>(65.3%, 94.4%) | 12 (80.0%)<br>(51.9%, 95.7%) | 63 (77.8%)<br>(67.2%, 86.3%) | 0.0207*  |
| Medial Anterior basal    | 2 (13.3%)<br>(1.7%, 40.5%)  | 8 (38.1%)<br>(18.1%, 61.6%)  | 18 (60.0%)<br>(40.6%, 77.3%) | 7 (46.7%)<br>(21.3%, 73.4%)  | 35 (43.2%)<br>(32.2%, 54.7%) | 0.0222*  |
| Lateral basal            | 4 (26.7%)<br>(7.8%, 55.1%)  | 14 (66.7%)<br>(43.0%, 85.4%) | 22 (73.3%)<br>(54.1%, 87.7%) | 9 (60.0%)<br>(32.3%, 83.7%)  | 49 (60.5%)<br>(49.0%, 71.2%) | 0.0254*  |
| Posterior                | 2 (13.3%)<br>(1.7%, 40.5%)  | 16 (76.2%)<br>(52.8%, 91.8%) | 24 (80.0%)<br>(61.4%, 92.3%) | 13 (86.7%)<br>(59.5%, 98.3%) | 55 (67.9%)<br>(56.6%, 77.9%) | <0.0001* |
| Total                    | 15                          | 57                           | 89                           | 41                           | 202                          |          |
| <b>Right upper lobe</b>  |                             |                              |                              |                              |                              |          |
| Apical                   | 4 (26.7%)<br>(7.8%, 55.1%)  | 15 (71.4%)<br>(47.8%, 88.7%) | 24 (80.0%)<br>(61.4%, 92.3%) | 12 (80.0%)<br>(51.9%, 95.7%) | 55 (67.9%)<br>(56.6%, 77.9%) | 0.0031*  |
| Posterior                | 4 (26.7%)<br>(7.8%, 55.1%)  | 13 (61.9%)<br>(38.4%, 81.9%) | 26 (86.7%)<br>(69.3%, 96.2%) | 10 (66.7%)<br>(38.4%, 88.2%) | 53 (65.4%)<br>(54.0%, 75.7%) | 0.0010*  |
| Anterior                 | 1 (6.7%)<br>(0.2%, 32.0%)   | 16 (76.2%)<br>(52.8%, 91.8%) | 25 (83.3%)<br>(65.3%, 94.4%) | 11 (73.3%)<br>(44.9%, 92.2%) | 53 (65.4%)<br>(54.0%, 75.7%) | <0.0001* |
| Total                    | 9                           | 44                           | 75                           | 33                           | 161                          |          |
| <b>Right middle lobe</b> |                             |                              |                              |                              |                              |          |
| Lateral                  | 0 (0.0%)<br>(0.0%, 21.8%)   | 15 (71.4%)<br>(47.8%, 88.7%) | 21 (70.0%)<br>(50.6%, 85.3%) | 12 (80.0%)<br>(51.9%, 95.7%) | 48 (59.3%)<br>(47.8%, 70.1%) | <0.0001* |
| Medial                   | 1 (6.7%)<br>(0.2%, 32.0%)   | 10 (47.6%)<br>(25.7%, 70.2%) | 20 (66.7%)<br>(47.2%, 82.7%) | 8 (53.3%)<br>(26.6%, 78.7%)  | 39 (48.2%)<br>(36.9%, 59.5%) | 0.0013*  |



|                                       |                            |                              |                              |                              |                              |          |
|---------------------------------------|----------------------------|------------------------------|------------------------------|------------------------------|------------------------------|----------|
| Total                                 | 2                          | 25                           | 41                           | 20                           | 87                           |          |
| <b>Right lower lobe</b>               |                            |                              |                              |                              |                              |          |
| Superior                              | 4 (26.7%)<br>(7.8%, 55.1%) | 16 (76.2%)<br>(52.8%, 91.8%) | 23 (76.7%)<br>(57.7%, 90.1%) | 12 (80.0%)<br>(51.9%, 95.7%) | 55 (67.9%)<br>(56.6%, 77.9%) | 0.0040*  |
| Medial basal                          | 3 (20.0%)<br>(4.3%, 48.1%) | 9 (42.9%)<br>(21.8%, 66.0%)  | 19 (63.3%)<br>(43.9%, 80.1%) | 9 (60.0%)<br>(32.3%, 83.7%)  | 40 (49.4%)<br>(38.1%, 60.7%) | 0.0347*  |
| Anterior                              | 1 (6.7%)<br>(0.2%, 32.0%)  | 10 (47.6%)<br>(25.7%, 70.2%) | 15 (50.0%)<br>(31.3%, 68.7%) | 7 (46.7%)<br>(21.3%, 73.4%)  | 33 (40.7%)<br>(30.0%, 52.2%) | 0.0197*  |
| Lateral basal                         | 1 (6.7%)<br>(0.2%, 32.0%)  | 12 (57.1%)<br>(34.0%, 78.2%) | 21 (70.0%)<br>(50.6%, 85.3%) | 10 (66.7%)<br>(38.4%, 88.2%) | 44 (54.3%)<br>(42.9%, 65.4%) | 0.0003*  |
| Posterior                             | 4 (26.7%)<br>(7.8%, 55.1%) | 14 (66.7%)<br>(43.0%, 85.4%) | 24 (80.0%)<br>(61.4%, 92.3%) | 11 (73.3%)<br>(45.0%, 92.2%) | 53 (65.4%)<br>(54.0%, 75.7%) | 0.0057*  |
| Total                                 | 13                         | 61                           | 102                          | 49                           | 225                          |          |
| <b>Total of all segments involved</b> | 44                         | 234                          | 389                          | 182                          | 849                          |          |
| <b>Average segments involved</b>      | 2.8 ± 3.3                  | 11.1 ± 5.4                   | 13.0 ± 5.7                   | 12.1 ± 5.9                   | 10.5 ± 6.4                   | <0.0001* |

Data are n (%) (95% CI).

\*p<0.05 between groups 1–4.
